# Supplementary material for: On-site decoking of Ca-looping process achieves 1000 cycles of stable thermochemical energy storage
Source: Research Square preprint supplement (doi:10.21203/rs.3.rs-8170634/v1), 2025-12-03
Supplement: Supplementary file 1 [file c2175f24d4fa2a39658d2126.docx]

**Supporting Information**

**On-site decoking of Ca-looping process achieves 1000 cycles of stable thermochemical energy storage**

Han Li1,2‡, Ke Tang1,2‡, Jiashun Wang1,2‡, Jinfeng Lin1,2, Xianfeng Qiao1,2, Junwei Li3, Hangbing Zheng1,2, Yan Zhuang1,2, Zhengxin Ding1.2*, Mingkai Fu4*, Pengzhao Wang5, Jinjia Wei6, Jinlin Long1,2*

1 State Key Laboratory of Chemistry for NBC Hazards Protection, College of Chemistry, Fuzhou University, Fuzhou 350116, P. R. China

2 State Key Laboratory of Photocatalysis on Energy and Environment, College of Chemistry, Fuzhou University, Fuzhou 350116, P. R. China

3 Department of Chemical Engineering, KU Leuven, Celestijnenlaan 200F, B-3001 Leuven, Belgium

4 Institute of Electrical Engineering, Chinese Academy of Sciences, Beijing, 100190, China

5 College of Chemical Engineering, Fuzhou University, Fuzhou 350108, P. R. China

6 School of Chemical Engineering and Technology, Xi’an Jiaotong University, Xi’an, Shaanxi 710049, China

*Corresponding Author. E-mail: zxding@fzu.edu.cn; fumingkai@mail.iee.ac.cn; jllong@fzu.edu.cn

‡These authors contributed equally to this work

**Table of Contents:**

Supplementary Figure S1-22

Supplementary Tables S1-8

Supplementary References

**Figure S1 to 21**

**Figure S1.** Preparation procedure of ternary component-doped CaO nanomaterials


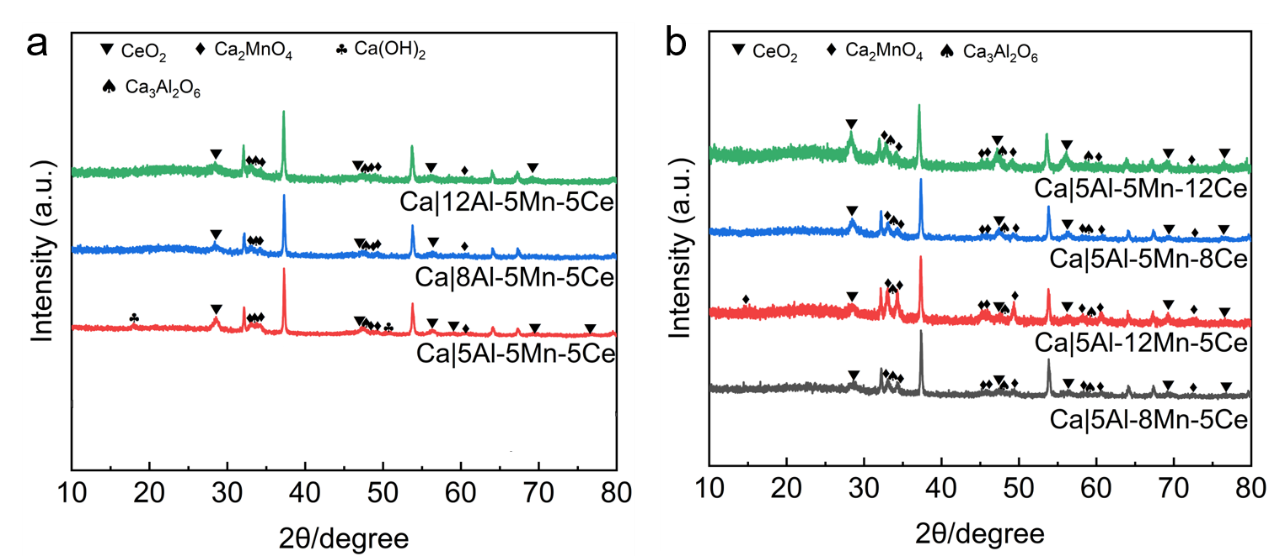


**Figure S2.** XRD pattern. (**a**) Ca|5Al-5Mn-5Ce, Ca|8Al-5Mn-5Ce, and Ca|12Al-5Mn-5Ce nanocarriers; (**b**) Ca|5Al-8Mn-5Ce, Ca|5Al-12Mn-5Ce, Ca|5Al-5Mn-8Ce, and Ca|5Al-5Mn-12Ce nanocarriers.


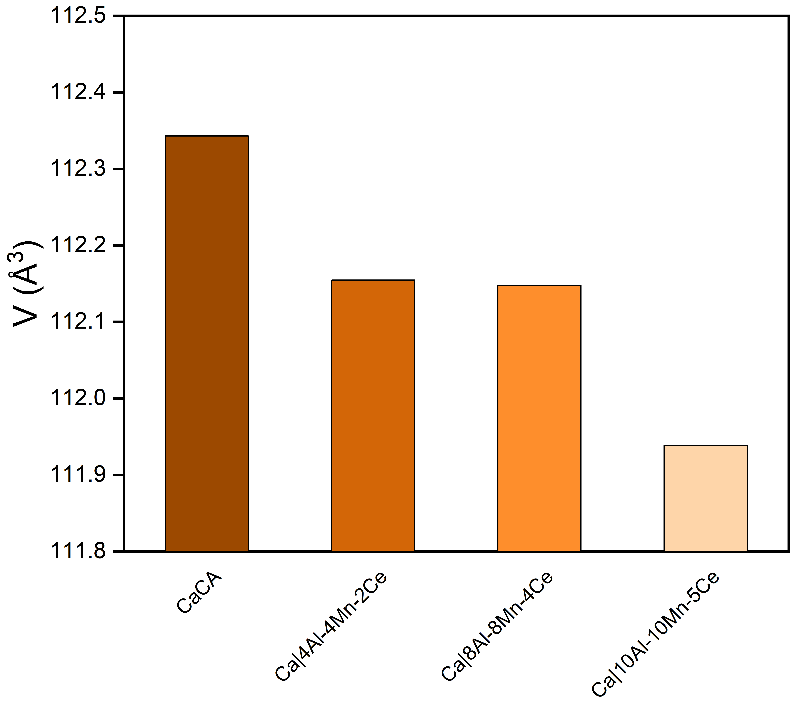


**Figure S3.** The cell volume of CaCA, Ca|4Al-4Mn-2Ce, Ca|8Al-8Mn-Ce and Ca|10Al-10Mn-5Ce.

**
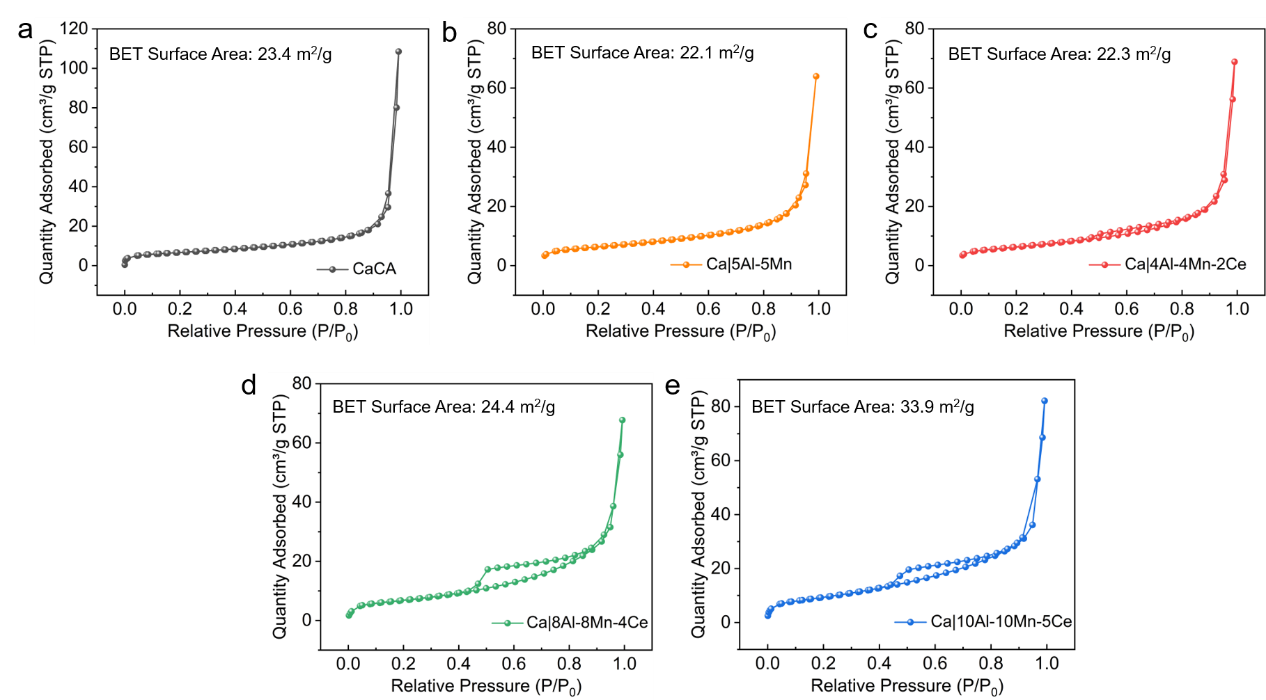
**

**Figure S4.** Nitrogen adsorption and desorption curves and BET surface area of (**a**) CaCA, (**b**) Ca|5Al-5Mn, (**c**) Ca|4Al-4Mn-2Ce, (**d**) Ca|8Al-8Mn-4Ce and (**e**) Ca|10Al-10Mn-5Ce.

**
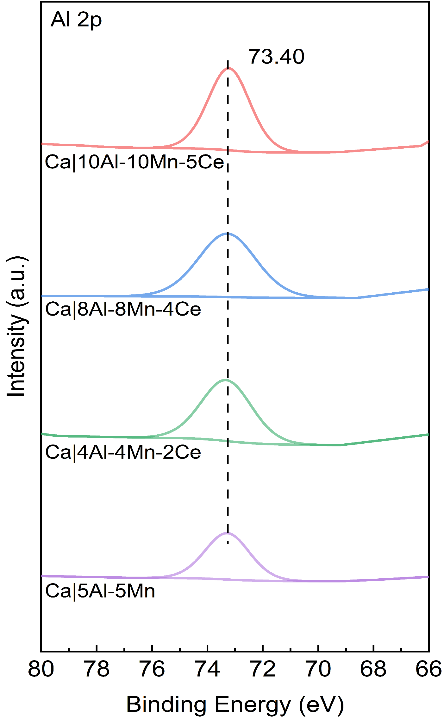
**

**Figure S5** Al 2p XPS spectra of Al-doped CaO samples.

**
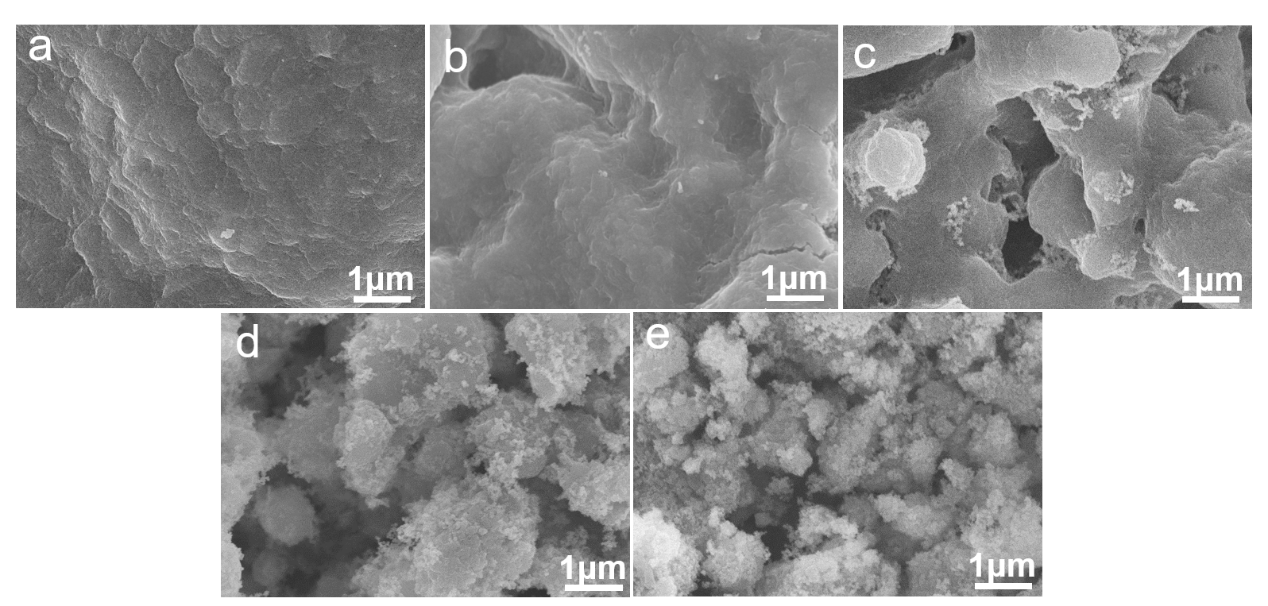
**

**Figure S6.** SEM images of Al/Mn/Ce composite CaO nanocarriers after 50 cycles (**a**) CaCA; (**b**) Ca|5Al-5Mn; (**c**) Ca|4Al-4Mn-2Ce; (**d**) Ca|8Al-8Mn-4Ce; (e) Ca|10Al-10Mn-5Ce.


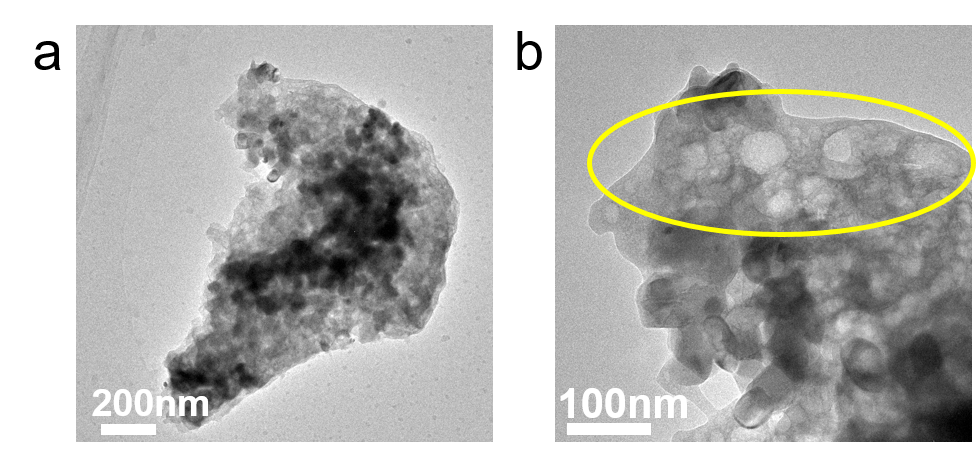


**Figure S7.** (**a**, **b**) TEM image of the Ca|10Al-10Mn-5Ce nanocarrier after 500 cycles


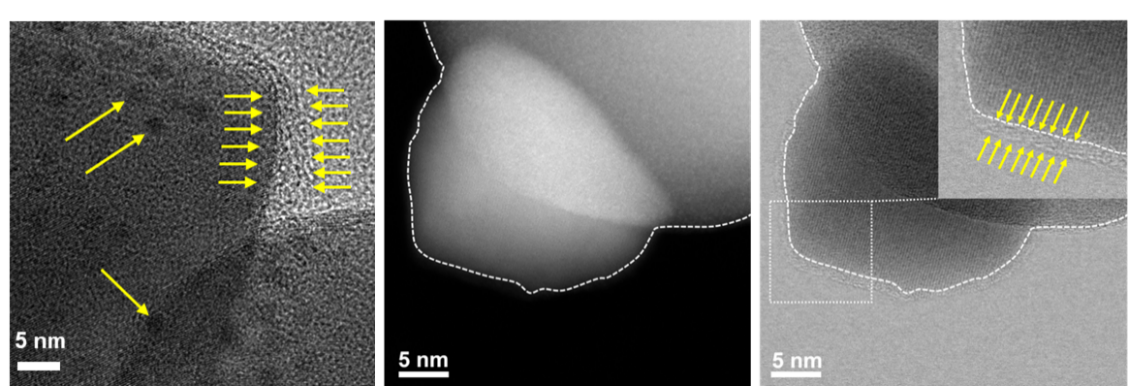


**Figure S8.** STEM image of the Ca|10Al-10Mn-5Ce after 500 cycles, it can be clearly observed that the surface of the nanoparticles is covered with a translucent film.

**Figure S9.** Optimized structures of (**a**) the CaO (100) with adsorbed CaO nanoclusters, (**b**) the Al/CaO(100) with adsorbed CaO nanoclusters, (**c**) the Mn/CaO(100) with adsorbed CaO nanoclusters, (**d**) the Al,Mn/CaO(100) with adsorbed CaO nanoclusters, (**e**) the Ce/CaO(100) with adsorbed CaO nanoclusters, (**f**) the Ca2MnO4(100) with adsorbed CaO nanoclusters, (**g**) the Ce/Ca2MnO4(100) with adsorbed CaO nanoclusters, (**h**) the Ca3Al2O6(011) with adsorbed CaO nanoclusters and (**i**) the Ce/Ca3Al2O6(011) with adsorbed CaO nanoclusters.


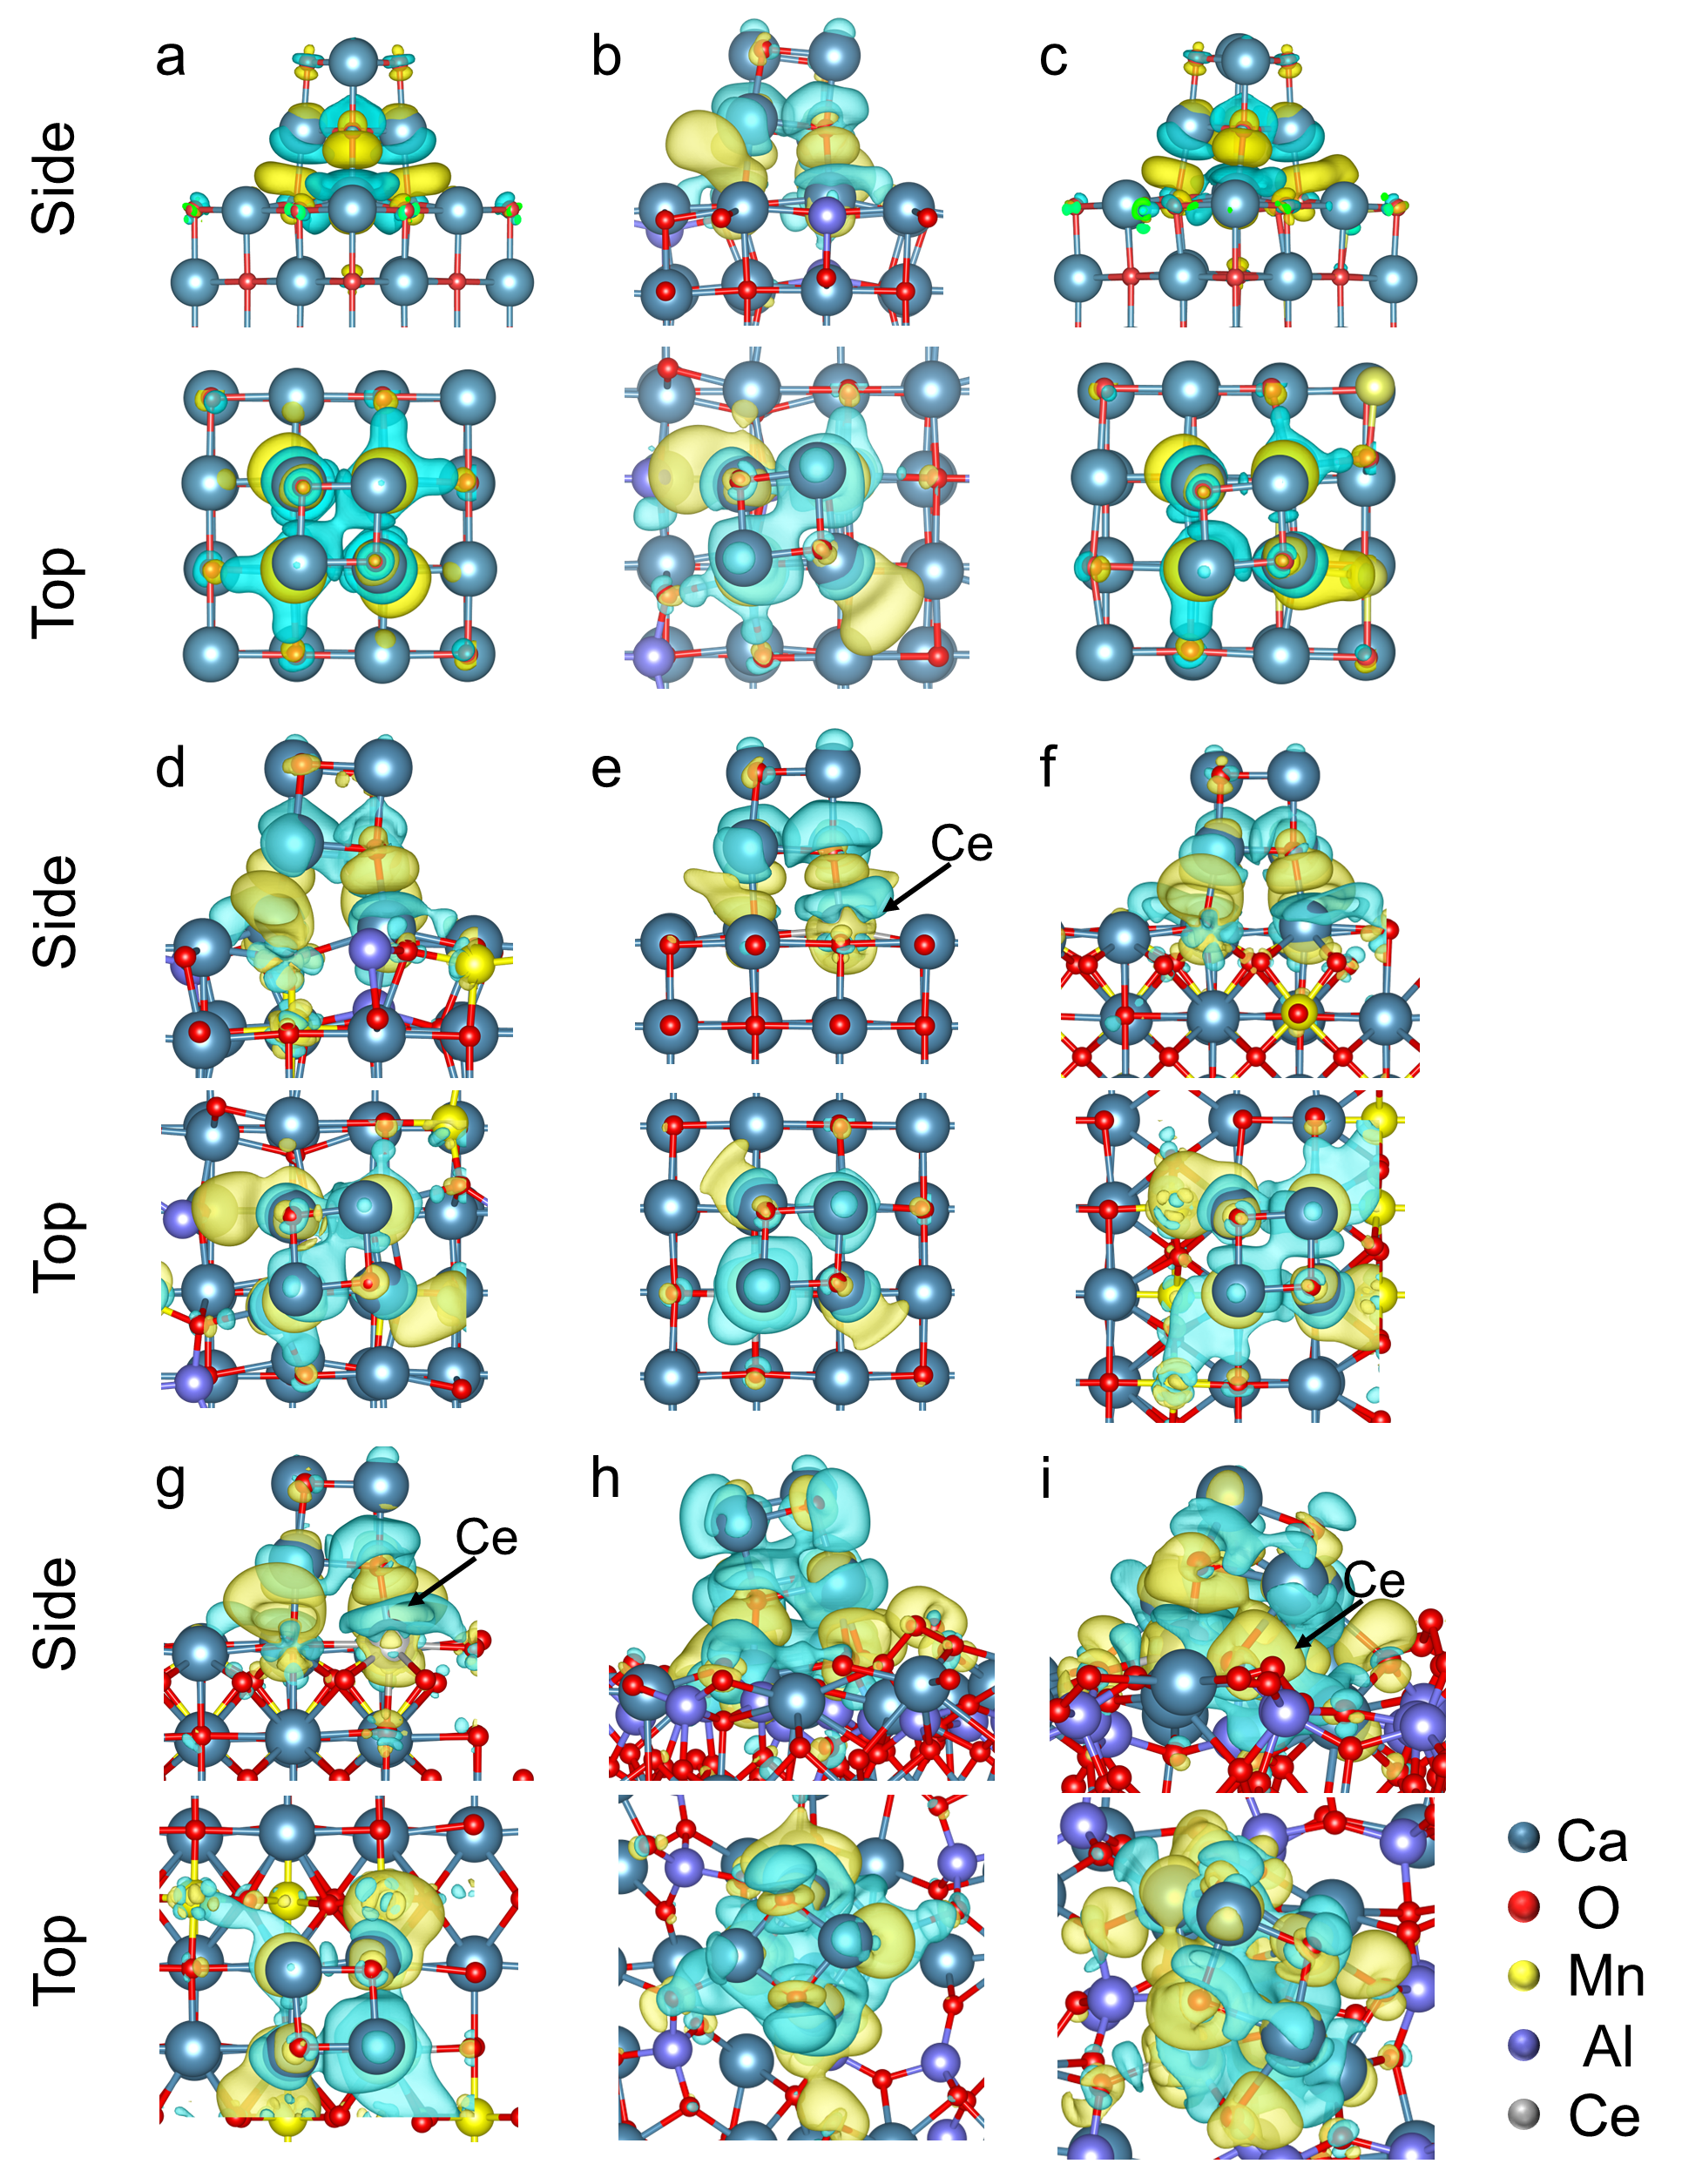


**Figure S10.** The differential charge density profile of (**a**) the CaO (100) with adsorbed CaO nanoclusters, (**b**) the Al/CaO(100) with adsorbed CaO nanoclusters, (**c**) the Mn/CaO(100) with adsorbed CaO nanoclusters, (**d**) the Al,Mn/CaO(100) with adsorbed CaO nanoclusters, (**e**) the Ce/CaO(100) with adsorbed CaO nanoclusters, (**f**) the Ca2MnO4(100) with adsorbed CaO nanoclusters, (**g**) the Ce/Ca2MnO4(100) with adsorbed CaO nanoclusters, (**h**) the Ca3Al2O6(100) with adsorbed CaO nanoclusters and (**i**) the Ce/Ca3Al2O6(100) with adsorbed CaO nanoclusters. Yellow and cyan represent electron accumulation and depletion region, respectively.

**
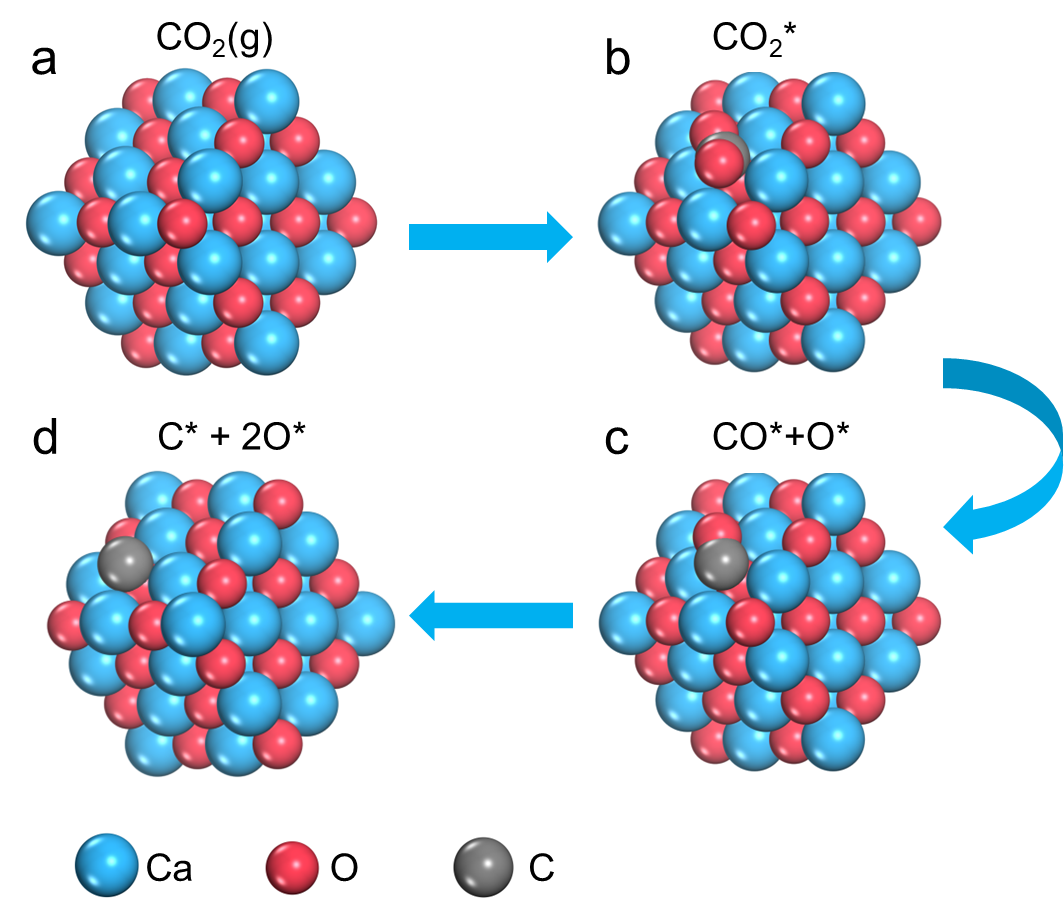
**

**Figure S11.** Optimized structures of reaction intermediates on CaO(100).

**
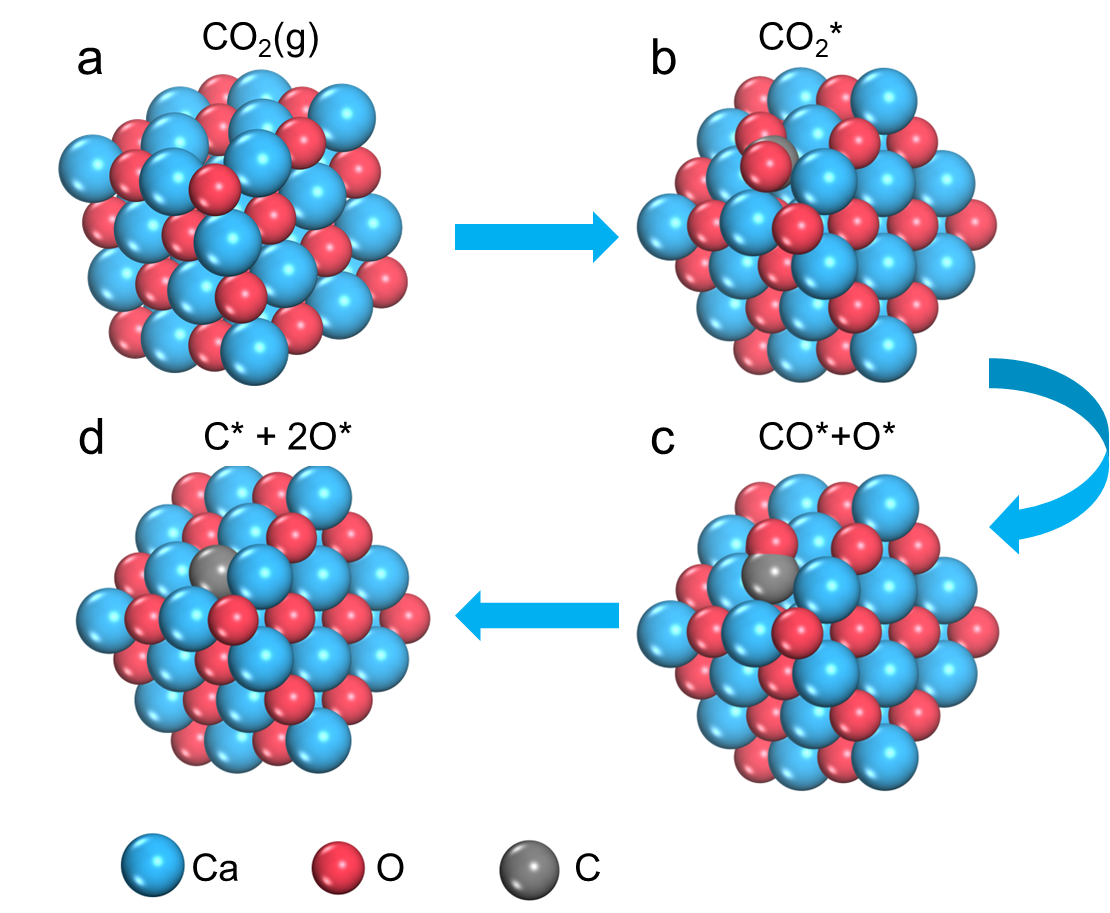
**

**Figure S12.** Optimized structures of reaction intermediates on CaO(100)/V(the V represents oxygen vacancy)

**
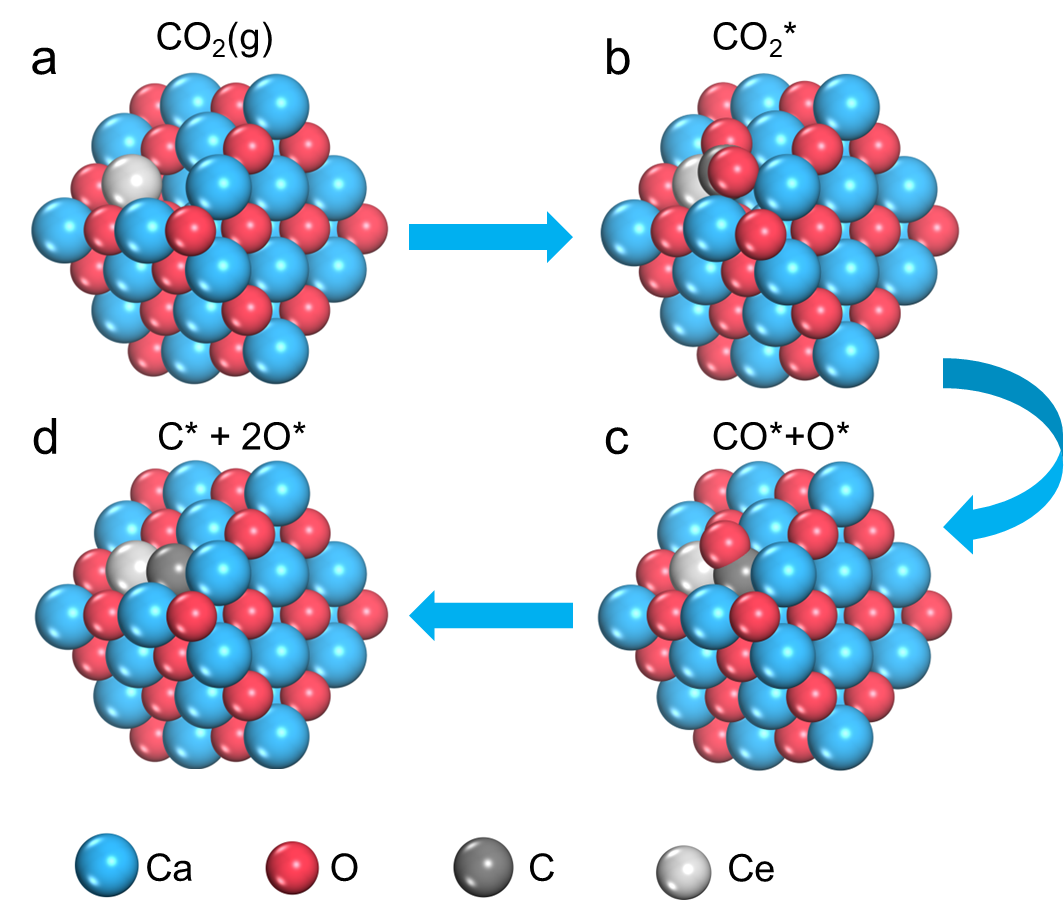
**

**Figure S13.** Optimized structures of reaction intermediates on Ce-CaO(100)/V(the V represents oxygen vacancy)

**
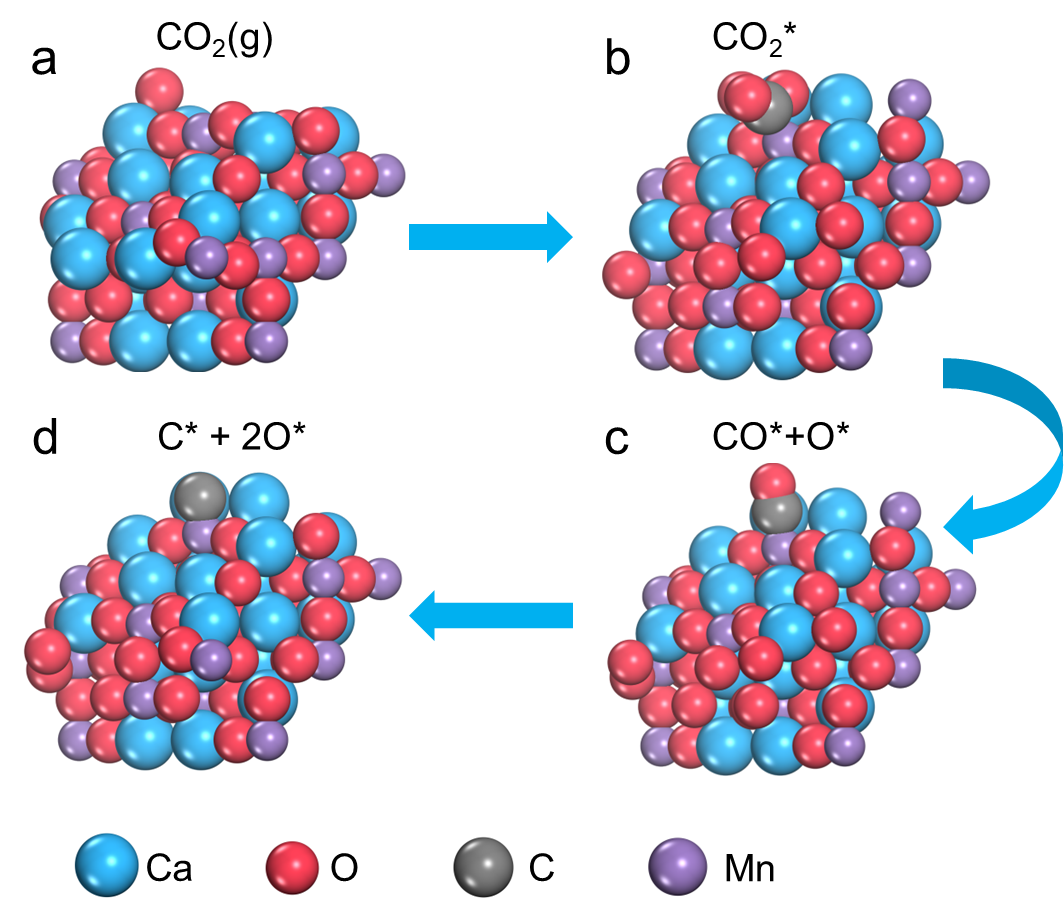
**

**Figure S14.** Optimized structures of reaction intermediates on Ca2MnO4(100)(the V represents oxygen vacancy)

**
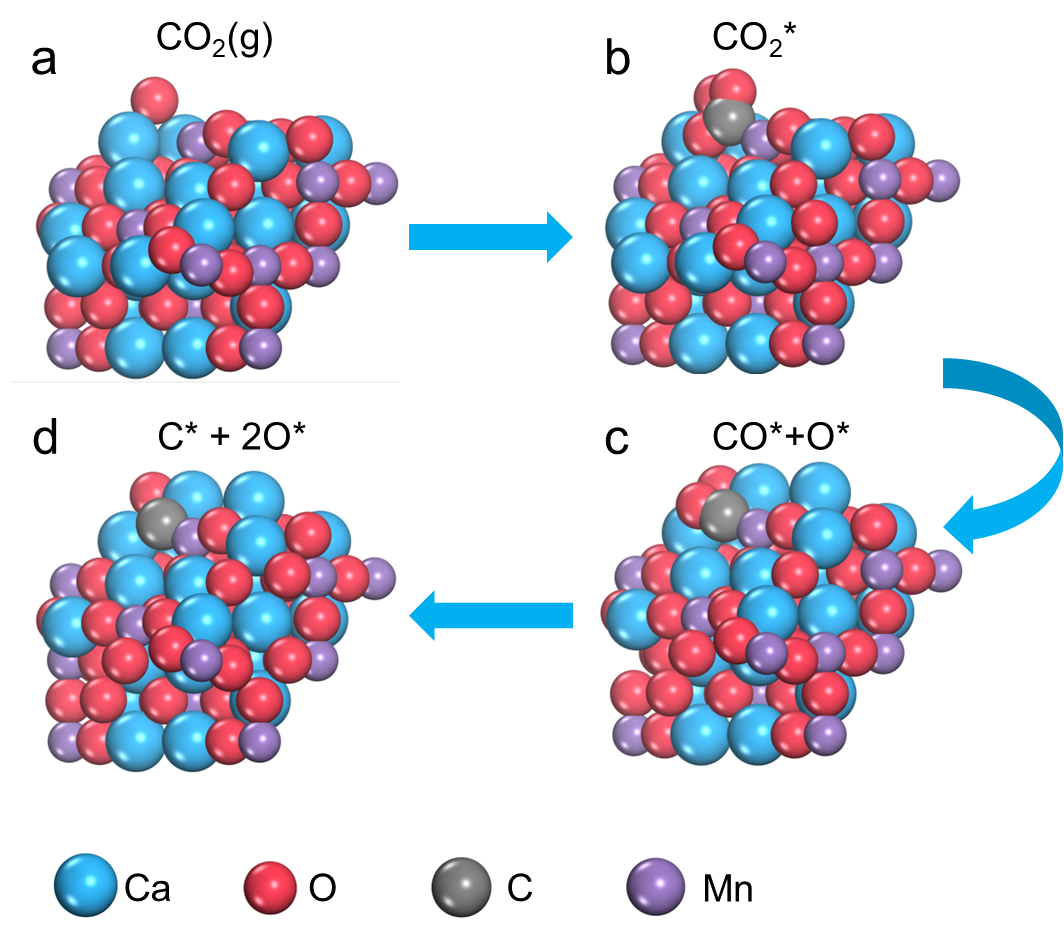
**

**Figure S15.** Optimized structures of reaction intermediates on Ca2MnO4(100)/V(the V represents oxygen vacancy)

**
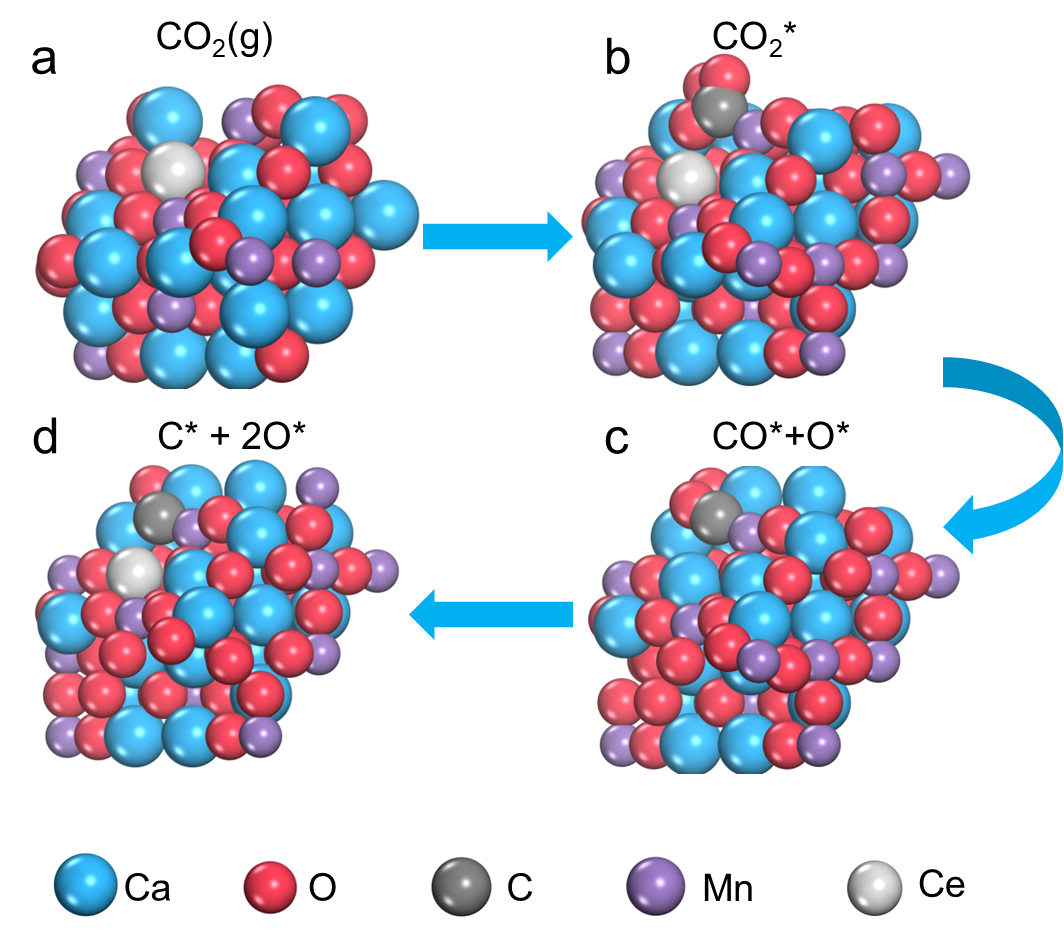
**

**Figure S16.** Optimized structures of reaction intermediates on Ce-Ca2MnO4(100)/V(the V represents oxygen vacancy)

**
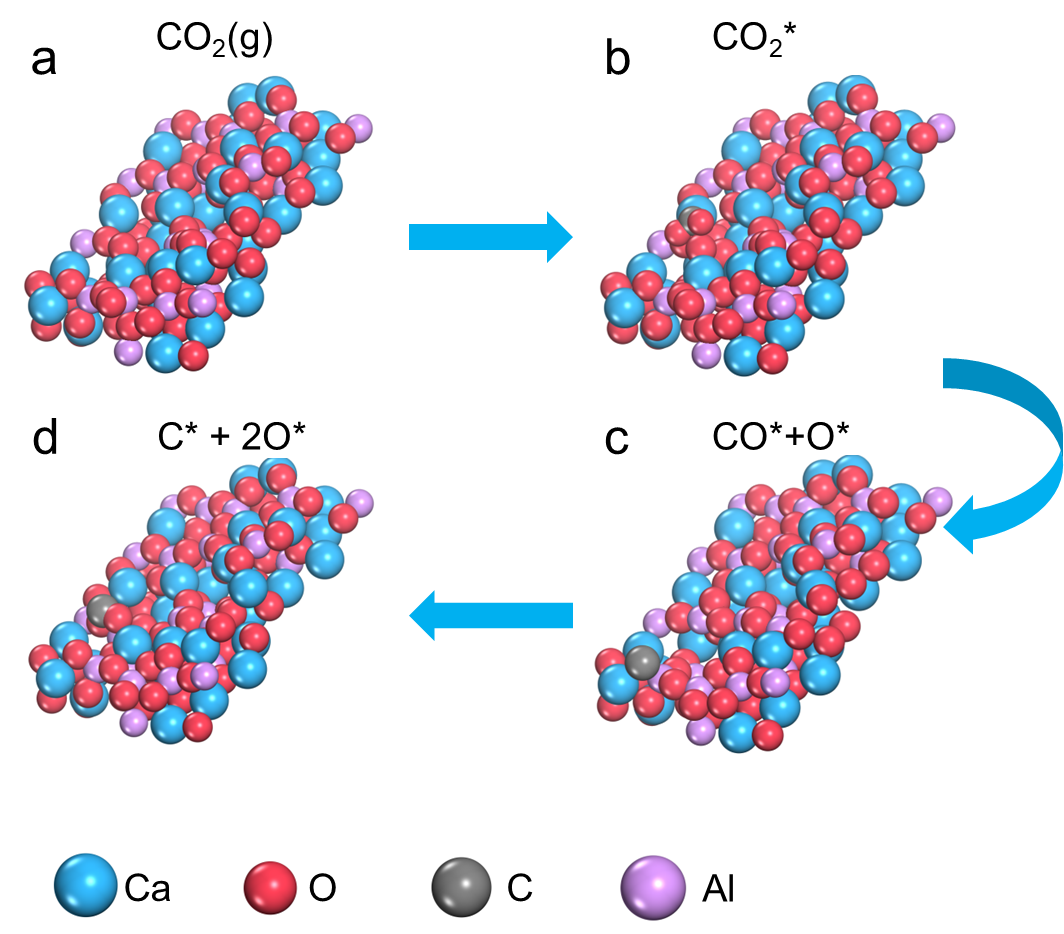
**

**Figure S17.** Optimized structures of reaction intermediates on Ca3Al2O6(100).(the V represents oxygen vacancy)

**
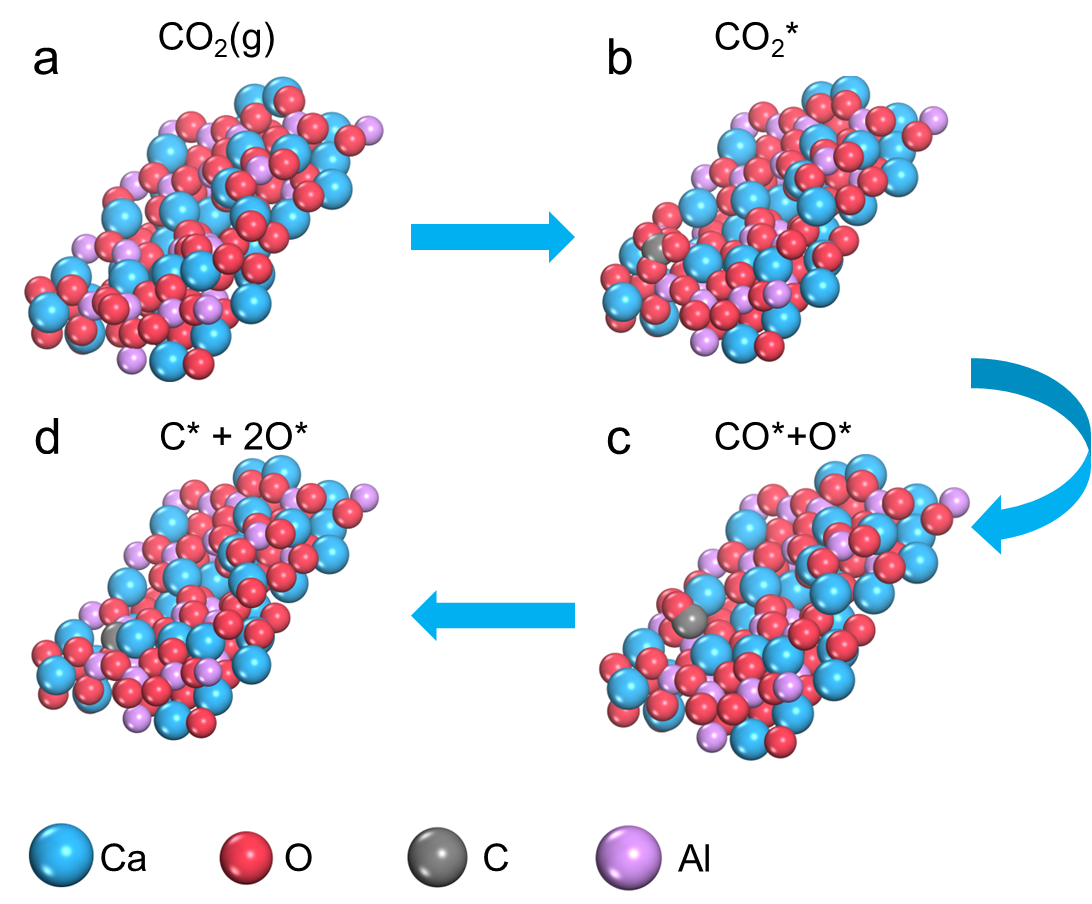
**

**Figure S18.** Optimized structures of reaction intermediates on Ca3Al2O6(100)/V.(the V represents oxygen vacancy)

**
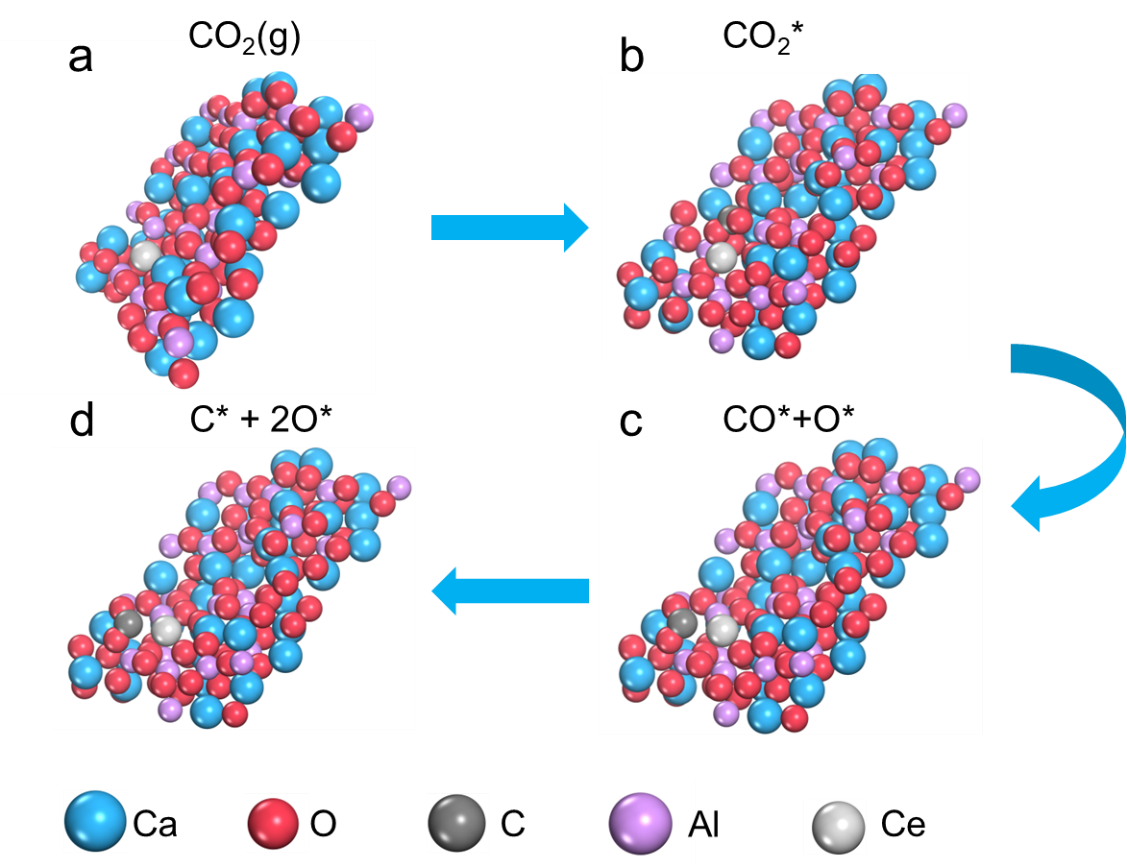
**

**Figure S19.** Optimized structures of reaction intermediates on Ce-Ca3Al2O6(100)/V.(the V represents oxygen vacancy)

**
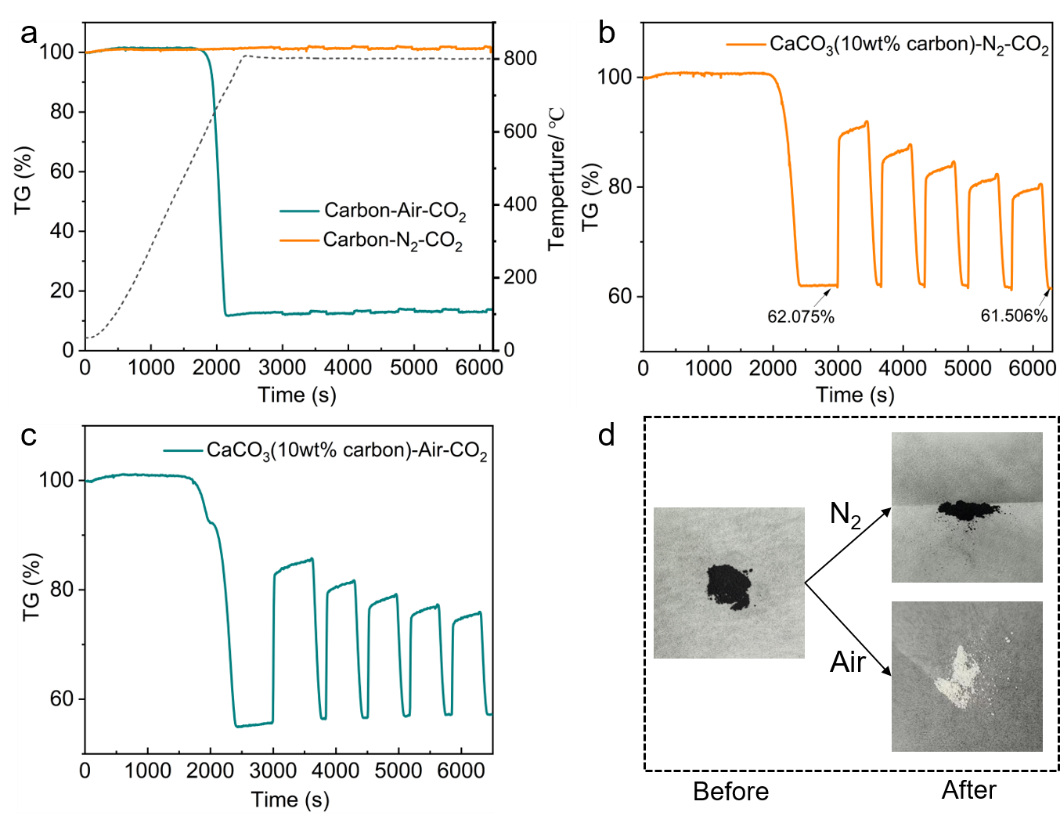
**

**Figure S20.** (**a**) TG diagram of carbon black tested in N2 and air calcination atmosphere for 5 cycles respectively; (**b**) TG diagram of 5 cycles of CaCO3(10wt% carbon) under N2 calcination atmosphere; (**c**) TG diagram of 5 cycles of CaCO3(10wt% carbon) under air calcination atmosphere; (**d**) Macroscopic appearance of CaCO3(10wt% carbon) before and after cycles under different calcining atmospheres.

**
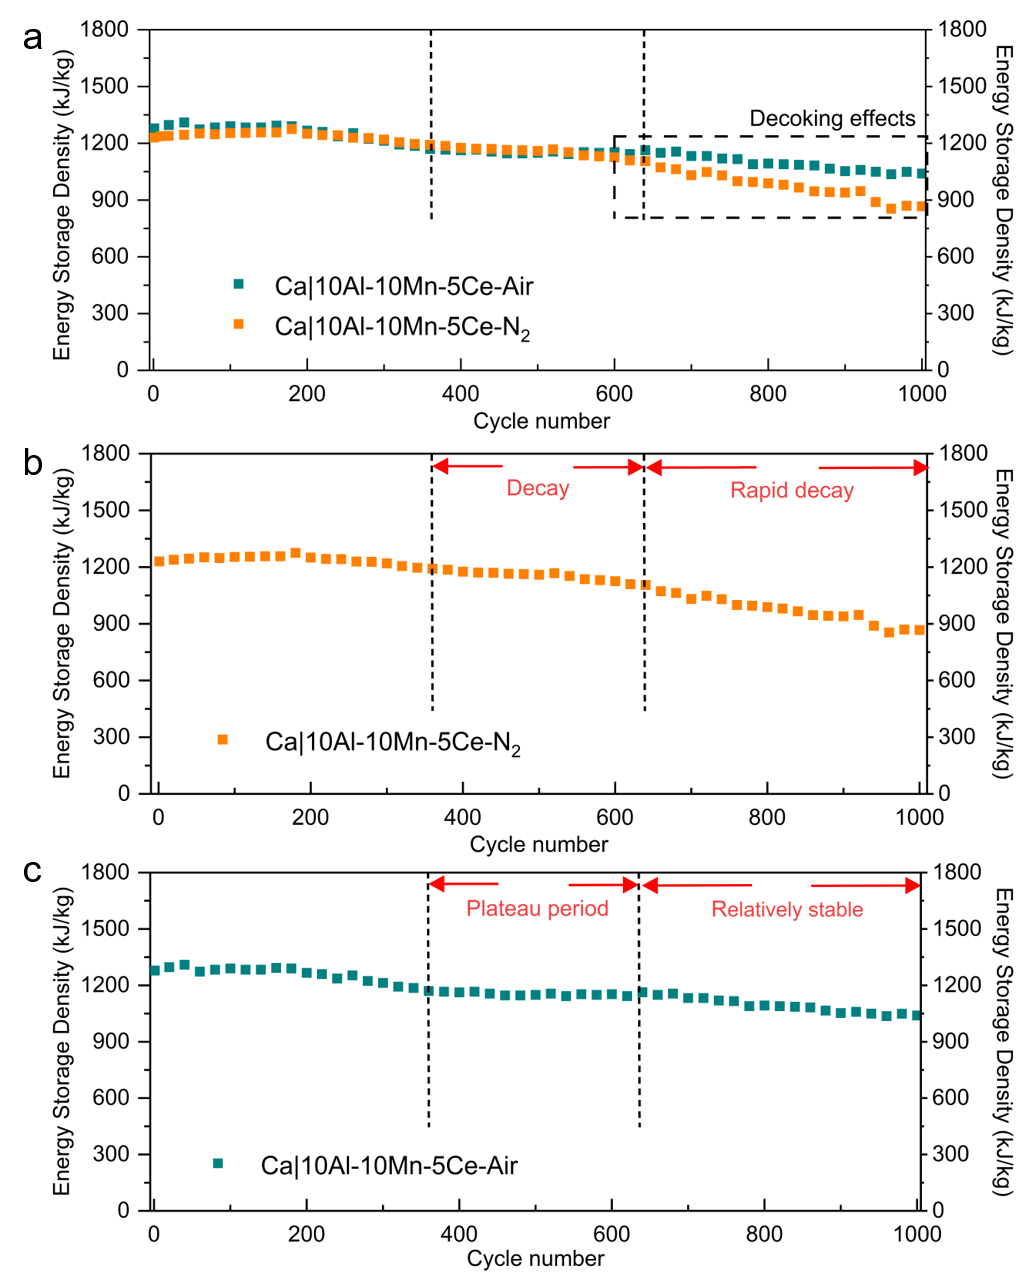
**

**Figure S21.** Stability of Ca|10Al-10Mn-5Ce after 1000 cycles under different calcination atmospheres, (**a**) N2-Air comparison, (**b**) N2 atmosphere, (**c**) Air atmosphere.

**
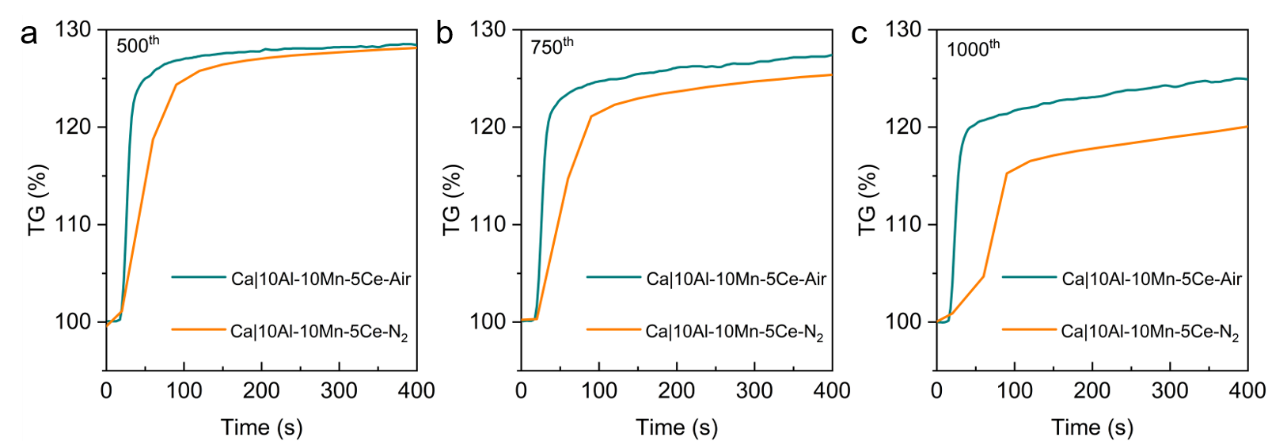
**

**Figure S22.** TG curve of Ca|10Al-10Mn-5Ce carbonation under calcination atmosphere of Air and N2, (**a**) 500th cycle; (**b**) 750th cycle; (**c**) 1000th cycle.

**Tabl S1 to 8**

**Table S1.** The crystal cell parameters of as-synthesized metal doping CaO samples. (Space group: Fm-3m)

| Samples | a[Å] | d(200) [Å] | V[Å3] |
| --- | --- | --- | --- |
| CaCA | 4.8252 | 2.4126 | 112.3430 |
| Ca|5Al-5Mn | 4.8287 | 2.4143 | 112.5876 |
| Ca|4Al-4Mn-2Ce | 4.8225 | 2.4112 | 112.1545 |
| Ca|8Al-8Mn-4Ce | 4.8224 | 2.4112 | 112.1475 |
| Ca|10Al-10Mn-5Ce | 4.8194 | 2.4097 | 111.9384 |
| Ca|5Al-5Mn-5Ce | 4.8200 | 2.4100 | 111.9802 |
| Ca|8Al-5Mn-5Ce | 4.8200 | 2.4100 | 111.9802 |
| Ca|12Al-5Mn-5Ce | 4.8277 | 2.4139 | 112.5177 |
| Ca|5Al-8Mn-5Ce | 4.8094 | 2.4047 | 111.2430 |
| Ca|5Al-12Mn-5Ce | 4.8179 | 2.4090 | 111.8339 |
| Ca|5Al-5Mn-8Ce | 4.8150 | 2.4075 | 111.6320 |
| Ca|5Al-5Mn-12Ce | 4.8422 | 2.4211 | 113.5346 |

**Table S2.** The BET surface area and pore volume of Al/Mn/Ce composite energy carriers.

| Sample | BET Surface Area (m2 g-1) | Pore volume of pores (cm3 g-1) | Average pore diameter  (nm) |
| --- | --- | --- | --- |
| CaCA | 23.4 | 0.0465 | 8.0 |
| Ca|5Al-5Mn | 22.1 | 0.0434 | 7.8 |
| Ca|4Al-4Mn-2Ce | 22.3 | 0.0468 | 18.3 |
| Ca||8Al-8Mn-4Ce | 24.4 | 0.0503 | 11.8 |
| Ca|10Al-10Mn-5Ce | 33.9 | 0.0616 | 12.5 |

**Table S3.** The CaO grain size of different nanocarrier was calculated by Debye-Scherrer formula

| Sample | Grain Size (nm) |
| --- | --- |
| CaCA | 23.4 |
| Ca|5Al-5Mn | 22.1 |
| Ca|4Al-4Mn-2Ce | 22.3 |
| Ca||8Al-8Mn-4Ce | 24.4 |
| Ca|10Al-10Mn-5Ce | 33.9 |

**Table S4.** Binding energies of Ce 3d XPS peaks of Al/Mn/Ce composite energy carriers.

| Sample | Binding energies of Ce 3d XPS peaks (eV) | | | | | | | | | |
| --- | --- | --- | --- | --- | --- | --- | --- | --- | --- | --- |
| v0 | v | v' | v'' | v''' | u0 | u | u' | u'' | u''' |
| Ca|4Al-4Mn-2Ce | 881.7 | 833.1 | 885.9 | 888.8 | 897.5 | 899.2 | 900.6 | 903.2 | 906.8 | 916.1 |
| Ca|8Al-8Mn-4Ce | 881.8 | 883.0 | 885.9 | 888.8 | 897.7 | 899.2 | 900.6 | 903.3 | 906.9 | 916.2 |
| Ca|10Al-10Mn-5Ce | 881.8 | 883.2 | 886.1 | 888.9 | 897.6 | 899.3 | 900.7 | 903.2 | 906.9 | 916.1 |

**Table S5.** Ce3+ relative amount (%) of Al/Mn/Ce co-doping energy carriers.

| Sample | relative amount (%) |
| --- | --- |
| Ca|4Al-4Mn-2Ce | 28.2 |
| Ca|8Al-8Mn-4Ce | 29.1 |
| Ca|10Al-10Mn-5Ce | 31.6 |

**Table S6**. Representative works on Ca-based thermochemical energy storage.

| Samples | Initial energy storage density  [kJ kg-1] | Cycle number | Energy storage density after cycle  [kJ kg-1] | Attenuation | Conditions  (carbonation/  calcination) |
| --- | --- | --- | --- | --- | --- |
| This work | 1230.0 | 1000 | 1039.6 | 15.5% | 800 ℃, 7.5 min/800 ℃, 6 min |
| Mg/CaO1 | 2034.0 | 30 | 1907 | 6.3 | 650 ℃, 20 min/900 ℃, 5 min |
| Al/CaO2 | 2002 | 30 | 1748 | 12.7% | 650 ℃, 20 min/900 ℃, 10 min |
| Na/CaO3 | 2161 | 50 | 1112 | 48.5% | 650 ℃, 20 min/800 ℃, 10 min |
| Ti, Ni/CaO4 | 1296 | 20 | 1267 | 2.2% | 750 ℃, 10 min/850 ℃, 5 min |
| Mn, Zr/CaCO35 | 1706 | 125 | 1604 | 6.0% | 800 ℃, 7 min/800 ℃, 4 min |
| Mn, Fe/CaO6 | 636 | 100 | 556 | 12.5% | 750 ℃, 60 min/750 ℃, 60 min |
| Ce, La, Nd, Yb, Zr/CaO7 | 1748 | 20 | 1653 | 5.4% | 650 ℃, 30 min/850 ℃, 5 min |
| SiC/CaO | 1120 | 40 | 482 | 57.0% | 884 ℃, 10 min/884 ℃, 20 min |
| Mn, Mg/CaO8 | 1520 | 100 | 1460 | 4.0% | 800 ℃, 10 min/800 ℃, 8 min |
| Ni, Zr/CaO9 | 2100 | 60 | 2000 | 4.8% | 850 ℃, 10 min/750 ℃, 15 min |
| Mn, Ce/CaO10 | 2480 | 20 | 2385 | 3.8% | 850 ℃, 10 min/850 ℃, 10 min |
| SiO2/CaO11 | 2542 | 50 | 1176 | 53.7% | 850 ℃, 35 min/650 ℃, 40 min |

**Table S7. Adsorption energy of CaO clusters on different substrates.**

| Name | The adsorption energy (eV) |
| --- | --- |
| CaO(100) | -2.92 |
| Mn/CaO(100) | -3.78 |
| Al/CaO(100) | -3.94 |
| AlMn/CaO(100) | -3.69 |
| Ce/CaO(100) | -3.73 |
| Ca2MnO4(110) | -4.18 |
| Ce/Ca2MnO4(110) | -4.47 |
| Ca3Al2O6(011) | -5.76 |
| Ce/Ca3Al2O6(011) | -6.48 |

**Table S8**. Carbon content of Ca|10Al-10Mn-5Ce before and after 500 cycles.

| sample | C (%) |
| --- | --- |
| Ca|10Al-10Mn-5Ce | 0.84 |
| Ca|10Al-10Mn-5Ce -500th | 1.31 |

**References:**

1. Naeem MA, et al. Optimization of the structural characteristics of CaO and its effective stabilization yield high-capacity CO2 sorbents. *Nat. Commun.* **9**, 2408 (2018).
2. Armutlulu A, et al. Multishelled CaO Microspheres Stabilized by Atomic Layer Deposition of Al2O3 for Enhanced CO2 Capture Performance. *Adv. Mater.* **29**, 1702896 (2017).
3. Krödel M, et al. Structure of Na Species in Promoted CaO‐Based Sorbents and Their Effect on the Rate and Extent of the CO2 Uptake. *Adv. Funct. Mater.* **33**, 2302916 (2023).
4. Guo SJ, Tian XK, Yan J, Ju SH, Zhao CY. Performance enhancement mechanisms of calcium-based thermochemical energy storage compounds: insights from first-principles and experimental investigations. *J. Mater. Chem. A* **12**, 14129-14147 (2024).
5. Li H, et al. 3D Ordered Macroporous Mn, Zr‐Doped CaCO3 Nanomaterials for Stable Thermochemical Energy Storage. *Adv. Sci.* **12**, 2412082 (2024).
6. Desage L, Humphries TD, Paskevicius M, Buckley CE. Reversible sorption of carbon dioxide in Ca–Mg–Fe systems for thermochemical energy storage applications. *J. Mater. Chem. A* **12**, 14721-14733 (2024).
7. Long Y, et al. High‐Entropy Fluorite Oxide‐Modified CaO‐Based Sorbent Pellets for Enhanced High‐Temperature CO2 Capture. *Small* **20**, 2406165 (2024).
8. Liu H, Li Y, Wei J. High performance Mn/Mg co-modified calcium-based material via EDTA chelating agent for effective solar energy storage. *Chem. Eng. J.* **480**, 147892 (2024).
9. Li Z-y, et al. Ni/Zr co-doping strategy to promote cyclic performance of CaO-based materials for thermochemical energy storage: Experimental and first-principles insights. *Chem. Eng. J.* **523**, 168897 (2025).
10. Zhang Y, et al. Screening dual variable-valence metal oxides doped calcium-based material for calcium looping thermochemical energy storage and CO2 capture with DFT calculation. *J. Energy Chem.* **107**, 170-182 (2025)
11. Li C-C, Wu U-T, Lin H-P. Cyclic performance of CaCO3@mSiO2 for CO2 capture in a calcium looping cycle. *J. Mater. Chem. A* **2**, 8252-8257 (2014).
